# Supplementary material
Source: PubMed Central journal article supplement (PMC3327812)
Supplement: NIHMS361791-supplement-2.pdf [file NIHMS361791-supplement-2.pdf]

Type of file: table

Label: TableS1

Filename: Cardamone et al 2011 Table S1.tif

|              | RPKM      |           | FC siCTL | RPKM       |            | FC siGPS2 | Ratio FC<br>siGPS2/siCTL |
|--------------|-----------|-----------|----------|------------|------------|-----------|--------------------------|
|              | siCTL-TNF | siCTL+TNF |          | siGPS2-TNF | siGPS2+TNF |           |                          |
| ATP5J2-PTCD1 | 0.5       | 1.12      | 2.24     | 0.01       | 1.01       | 101.00    | 45.09                    |
| IRX4         | 0.1       | 0.28      | 2.80     | 0.01       | 0.46       | 46.00     | 16.43                    |
| MORN5        | 0.15      | 0.45      | 3.00     | 0.01       | 0.37       | 37.00     | 12.33                    |
| GABRR2       | 0.07      | 0.19      | 2.71     | 0.01       | 0.31       | 31.00     | 11.42                    |
| CXCL6        | 0.07      | 0.37      | 5.29     | 0.01       | 0.53       | 53.00     | 10.03                    |
| LRRC70       | 0.05      | 0.14      | 2.80     | 0.01       | 0.28       | 28.00     | 10.00                    |
| HSPA6        | 0.13      | 0.29      | 2.23     | 0.01       | 0.19       | 19.00     | 8.52                     |
| ZNF442       | 0.12      | 0.25      | 2.08     | 0.01       | 0.16       | 16.00     | 7.68                     |
| FAM129C      | 0.09      | 0.19      | 2.11     | 0.01       | 0.16       | 16.00     | 7.58                     |
| LOC723809    | 0.06      | 0.18      | 3.00     | 0.01       | 0.21       | 21.00     | 7.00                     |
| C12orf77     | 0.19      | 0.84      | 4.42     | 0.01       | 0.27       | 27.00     | 6.11                     |
| FLJ41200     | 0.1       | 0.21      | 2.10     | 0.01       | 0.12       | 12.00     | 5.71                     |
| TNF          | 0.07      | 8.46      | 120.86   | 0.01       | 6.76       | 676.00    | 5.59                     |
| FRMD1        | 0.04      | 0.16      | 4.00     | 0.01       | 0.21       | 21.00     | 5.25                     |
| DES          | 0.31      | 0.74      | 2.39     | 0.01       | 0.12       | 12.00     | 5.03                     |
| KCNE4        | 0.1       | 0.54      | 5.40     | 0.01       | 0.26       | 26.00     | 4.81                     |
| RAB40A       | 0.16      | 0.69      | 4.31     | 0.05       | 0.93       | 18.60     | 4.31                     |
| BMP5         | 0.05      | 0.28      | 5.60     | 0.01       | 0.23       | 23.00     | 4.11                     |
| AQP4         | 0.14      | 0.35      | 2.50     | 0.03       | 0.29       | 9.67      | 3.87                     |
| FAM138B      | 0.14      | 0.56      | 4.00     | 0.01       | 0.15       | 15.00     | 3.75                     |
| CXCL1        | 0.25      | 2.3       | 9.20     | 0.13       | 4.17       | 32.08     | 3.49                     |
| PROK1        | 0.08      | 0.23      | 2.88     | 0.01       | 0.1        | 10.00     | 3.48                     |
| IL7          | 0.01      | 0.15      | 15.00    | 0.01       | 0.48       | 48.00     | 3.20                     |
| C1orf104     | 0.46      | 1         | 2.17     | 0.12       | 0.82       | 6.83      | 3.14                     |
| CA5A         | 0.1       | 0.43      | 4.30     | 0.01       | 0.12       | 12.00     | 2.79                     |
| PTENP1       | 0.5       | 0.91      | 1.82     | 0.32       | 1.48       | 4.63      | 2.54                     |
| CXCL2        | 0.49      | 0.95      | 1.94     | 0.44       | 2.13       | 4.84      | 2.50                     |
| ANKRD53      | 0.06      | 0.29      | 4.83     | 0.01       | 0.12       | 12.00     | 2.48                     |
| SLC24A2      | 0.64      | 1.18      | 1.84     | 0.34       | 1.55       | 4.56      | 2.47                     |
| ICAM1        | 0.1       | 0.26      | 2.60     | 0.05       | 0.32       | 6.40      | 2.46                     |
| DMRTA2       | 0.32      | 0.78      | 2.44     | 0.09       | 0.52       | 5.78      | 2.37                     |
| CD34         | 0.21      | 0.43      | 2.05     | 0.05       | 0.23       | 4.60      | 2.25                     |
| NUDT16P1     | 0.06      | 0.33      | 5.50     | 0.01       | 0.12       | 12.00     | 2.18                     |
| PLAU         | 0.59      | 1.45      | 2.46     | 0.32       | 1.68       | 5.25      | 2.14                     |
| NFATC2       | 0.1       | 0.19      | 1.90     | 0.05       | 0.2        | 4.00      | 2.11                     |
| VCAM1        | 0.01      | 0.7       | 70.00    | 0.01       | 1.45       | 145.00    | 2.07                     |
| LOC390595    | 0.29      | 0.66      | 2.28     | 0.1        | 0.45       | 4.50      | 1.98                     |
| C14orf50     | 0.29      | 0.55      | 1.90     | 0.1        | 0.36       | 3.60      | 1.90                     |
| ALPK2        | 0.3       | 0.64      | 2.13     | 0.22       | 0.88       | 4.00      | 1.88                     |
| SELE         | 0.01      | 0.16      | 16.00    | 0.01       | 0.29       | 29.00     | 1.81                     |
| BIRC3        | 0.27      | 0.72      | 2.67     | 0.31       | 1.43       | 4.61      | 1.73                     |
| CCL2         | 0.01      | 2.07      | 207.00   | 0.01       | 3.55       | 355.00    | 1.71                     |
| LCP1         | 0.16      | 0.4       | 2.50     | 0.1        | 0.42       | 4.20      | 1.68                     |
| EBLN2        | 0.13      | 0.37      | 2.85     | 0.16       | 0.76       | 4.75      | 1.67                     |
| GRP          | 0.01      | 0.37      | 37.00    | 0.01       | 0.6        | 60.00     | 1.62                     |
| DOC2GP       | 0.01      | 0.38      | 38.00    | 0.01       | 0.61       | 61.00     | 1.61                     |
| FAM27B       | 0.01      | 0.12      | 12.00    | 0.01       | 0.19       | 19.00     | 1.58                     |
| C12orf39     | 0.7       | 1.35      | 1.93     | 0.44       | 1.32       | 3.00      | 1.56                     |
| APLF         | 0.7       | 2.01      | 2.87     | 0.91       | 4.03       | 4.43      | 1.54                     |
| TDO2         | 0.01      | 0.1       | 10.00    | 0.01       | 0.15       | 15.00     | 1.50                     |
| IL8          | 0.24      | 6.45      | 26.88    | 0.3        | 11.57      | 38.57     | 1.44                     |
| EFNA1        | 5.26      | 11.04     | 2.10     | 4.32       | 12.93      | 2.99      | 1.43                     |
| CD83         | 11.23     | 33.97     | 3.02     | 9.9        | 42.08      | 4.25      | 1.41                     |
| TIFA         | 7.78      | 16.48     | 2.12     | 6.72       | 19.97      | 2.97      | 1.40                     |
| LOC121952    | 0.16      | 0.33      | 2.06     | 0.06       | 0.17       | 2.83      | 1.37                     |
| GOLGA8DP     | 0.66      | 1.38      | 2.09     | 0.45       | 1.29       | 2.87      | 1.37                     |
| HNRNPCL1     | 0.1       | 0.28      | 2.80     | 0.06       | 0.23       | 3.83      | 1.37                     |
| NLRC4        | 0.18      | 0.41      | 2.28     | 0.12       | 0.37       | 3.08      | 1.35                     |
| TEPP         | 0.13      | 0.29      | 2.23     | 0.08       | 0.24       | 3.00      | 1.34                     |
| SLC16A6      | 1.77      | 3.31      | 1.87     | 1.75       | 4.32       | 2.47      | 1.32                     |
| LOC649330    | 0.11      | 0.31      | 2.82     | 0.07       | 0.26       | 3.71      | 1.32                     |
| USP43        | 1.79      | 4.19      | 2.34     | 1.3        | 3.99       | 3.07      | 1.31                     |
| COL6A5       | 0.03      | 0.11      | 3.67     | 0.05       | 0.24       | 4.80      | 1.31                     |
| SERPINA6     | 0.33      | 2.43      | 7.36     | 0.25       | 2.4        | 9.60      | 1.30                     |
| RPL36A-HNRNF | 2.6       | 6.84      | 2.63     | 1.52       | 5.16       | 3.39      | 1.29                     |
| IGF2AS       | 0.01      | 0.11      | 11.00    | 0.01       | 0.14       | 14.00     | 1.27                     |
| C2CD4A       | 0.67      | 1.31      | 1.96     | 0.57       | 1.41       | 2.47      | 1.27                     |
| STX11        | 0.96      | 2.05      | 2.14     | 0.9        | 2.42       | 2.69      | 1.26                     |
| JAM2         | 2.12      | 4.08      | 1.92     | 2.64       | 6.37       | 2.41      | 1.25                     |
| SLC16A9      | 5.34      | 12.23     | 2.29     | 5.38       | 15.42      | 2.87      | 1.25                     |
| TRIM10       | 0.06      | 0.3       | 5.00     | 0.04       | 0.25       | 6.25      | 1.25                     |
| LAMP3        | 1.57      | 3.25      | 2.07     | 1.65       | 4.23       | 2.56      | 1.24                     |
| SCRT1        | 0.14      | 0.51      | 3.64     | 0.04       | 0.18       | 4.50      | 1.24                     |
| PTX3         | 1.5       | 6.64      | 4.43     | 1.5        | 8.2        | 5.47      | 1.23                     |
| SUN3         | 0.01      | 0.22      | 22.00    | 0.01       | 0.27       | 27.00     | 1.23                     |
| ESM1         | 0.1       | 0.22      | 2.20     | 0.18       | 0.48       | 2.67      | 1.21                     |
| PHLDA1       | 1.18      | 5.54      | 4.69     | 1.15       | 6.48       | 5.63      | 1.20                     |
| OPTN         | 9.81      | 21        | 2.14     | 10.03      | 25.45      | 2.54      | 1.19                     |
| HRH2         | 0.1       | 0.2       | 2.00     | 0.09       | 0.21       | 2.33      | 1.17                     |
| TOP1P2       | 0.15      | 0.34      | 2.27     | 0.14       | 0.37       | 2.64      | 1.17                     |
| PLA2G4C      | 0.87      | 5.46      | 6.28     | 1.03       | 7.44       | 7.22      | 1.15                     |
| RIMS1        | 0.06      | 0.15      | 2.50     | 0.07       | 0.2        | 2.86      | 1.14                     |
| C21orf82     | 0.26      | 0.51      | 1.96     | 0.21       | 0.47       | 2.24      | 1.14                     |
| TNFAIP3      | 2.03      | 18.4      | 9.06     | 1.86       | 19.15      | 10.30     | 1.14                     |
| CXCL10       | 0.01      | 5.03      | 503.00   | 0.01       | 5.69       | 569.00    | 1.13                     |
| RSPO1        | 0.07      | 0.26      | 3.71     | 0.05       | 0.21       | 4.20      | 1.13                     |
| NFKB1        | 11.76     | 26.63     | 2.26     | 11.52      | 29.09      | 2.53      | 1.12                     |
| FAM35B       | 0.01      | 0.74      | 74.00    | 0.01       | 0.82       | 82.00     | 1.11                     |
| CCL20        | 0.01      | 10.39     | 1039.00  | 0.01       | 11.46      | 1146.00   | 1.10                     |
